# Supplementary material for: Playing with ionic liquid mixtures to design engineered CO2separation membranes
Source: Royal Society of Chemistry journal article supplement (doi:10.1039/c4cp01434k), 2014-06-13
Supplement: c4cp01434k1.pdf [file c4cp01434k1.pdf]

## Supplementary Information

# Playing with ionic liquid mixtures to design engineered CO<sub>2</sub> separation membranes

*Liliana C. Tomé,<sup>a,b</sup> Catarina Florindo,<sup>a</sup> Carmen S.R. Freire,<sup>b</sup> Luís Paulo N. Rebelo<sup>a</sup> and  
Isabel M. Marrucho<sup>\*a</sup>*

<sup>a</sup>Instituto de Tecnologia Química e Biológica António Xavier, Universidade Nova de Lisboa, Av.  
República, 2780-157 Oeiras, Portugal

<sup>b</sup>CICECO, Departamento de Química, Universidade de Aveiro, Campus Universitário de Santiago,  
3810-193 Aveiro, Portugal

\*Corresponding author

Tel: +351-21-4469444

Fax: +351-21-4411277

e-mail: [imarrucho@itqb.unl.pt](mailto:imarrucho@itqb.unl.pt)

## Density measurements

Densities of the pure ionic liquids (ILs) and their mixtures were measured in the temperature range from 293.15 K to 353.15 K and are reported in Table S1 and S2, and illustrated in Figure S1 and S2, respectively. Additionally, a comparison of these results with literature values is shown in Table S3. When comparing the experimental results obtained in this work with those published in the literature for the same pure ILs, it can be observed that they are consistent with each other, with the exception of the pure [C<sub>2</sub>mim][C<sub>1</sub>SO<sub>4</sub>], in which a deviation of 0.31 % for density and 16.1 % for viscosity values were observed. These differences can be attributed to the content of water in the IL. However, a direct comparison cannot be made since some of the authors do not report the quantity of water in their samples.

The density decreases linearly with temperature, for all pure ILs and their mixtures, in the whole temperature range studied. The linear equation (S1) was used to correlate the temperature dependence of the density:

$$\rho = a + b(T) \quad (\text{S1})$$

where  $\rho$  corresponds to density (g·cm<sup>-3</sup>),  $T$  is the temperature (K) and  $a$  and  $b$  are the fitting parameters. The  $a$  and  $b$  values, derived from the equation (S1), obtained for all the studied samples are presented in Table S4.

The molar volumes ( $V_m$ ) of the pure ILs and their mixtures are presented in Table S5 and S6, respectively. The excess molar volume ( $V^E$ ) of the IL mixtures was calculated by equation (S2):

$$V^E = \frac{x_1 M_1 + x_2 M_2}{\rho_M} - \frac{x_1 M_1}{\rho_1} - \frac{x_2 M_2}{\rho_2} \quad (\text{S2})$$

where  $\rho$  corresponds to the density (g·cm<sup>-3</sup>),  $x$  is the molar fraction and the  $M$  corresponds to the molar mass (g·mol<sup>-1</sup>). The subscript 1 and 2 refer to the two pure ILs and the subscript  $M$  denotes the IL mixture. The calculated excess molar volumes are listed in Table S7 and depicted in Figure S3 for 293.15K.

As expected, Figure S1 and Figure S2 show that the density values of mixtures are in between those of the pure ILs. The density values can be grouped into two distinct groups: the sulfate-based ILs (values from 1.2 to 1.3 g·cm<sup>-3</sup>) and the cyano-based ILs (values from 1.0 to 1.15 g·cm<sup>-3</sup>). The density values of pure ILs decrease with the increase in the alkyl chain length in the sulfate and with the increase in the number of cyano groups in the anion of the IL (Figure S1). Accordingly, at a fixed

temperature, the densities of the pure ILs can be ranked according to the following anion order:  $[\text{C}_1\text{SO}_4]^- > [\text{C}_2\text{SO}_4]^- > [\text{SCN}]^- > [\text{N}(\text{CN})_2]^- > [\text{C}(\text{CN})_3]^- > [\text{B}(\text{CN})_4]^-$ .

The excess molar volumes ( $V^E$ ) are the result of contributions from several effects, namely: chemical, physical and structural modifications. Physical contributions originate positive  $V^E$  values, which are non-specific interactions between the real species present in the mixture.<sup>6</sup> Negative  $V^E$  values is a result of chemical contributions (charge-transfer type forces, changes in hydrogen bonding equilibrium or electrostatic interactions) or structural contributions (geometrical fitting or changes of free volume).<sup>6</sup> The  $V^E$  obtained for all the studied mixtures at different temperatures present positive values, with the exception of those obtained for the  $[\text{C}_2\text{mim}][\text{C}_1\text{SO}_4]_{0.5}[\text{N}(\text{CN})_2]_{0.5}$  mixture, that present a negative  $V^E$  in the whole range temperature, and for the  $[\text{C}_2\text{mim}][\text{SCN}]_{0.5}[\text{N}(\text{CN})_2]_{0.5}$  mixture that presented a negative  $V^E$  values for higher temperatures (from 343.15 K to 353.15K).

**Table S1** Measured densities,  $\rho$  ( $\text{g}\cdot\text{cm}^{-3}$ ), of the pure ionic liquids studied in this work.

| $T$ (K) | $[\text{C}_2\text{mim}][\text{C}_1\text{SO}_4]$ | $[\text{C}_2\text{mim}][\text{C}_2\text{SO}_4]$ | $[\text{C}_2\text{mim}][\text{SCN}]^*$ | $[\text{C}_2\text{mim}][\text{N}(\text{CN})_2]^*$ | $[\text{C}_2\text{mim}][\text{C}(\text{CN})_3]$ | $[\text{C}_2\text{mim}][\text{B}(\text{CN})_4]$ |
|---------|-------------------------------------------------|-------------------------------------------------|----------------------------------------|---------------------------------------------------|-------------------------------------------------|-------------------------------------------------|
| 293.15  | 1.294                                           | 1.241                                           | 1.119                                  | 1.106                                             | 1.085                                           | 1.040                                           |
| 298.15  | 1.291                                           | 1.237                                           | 1.116                                  | 1.103                                             | 1.081                                           | 1.036                                           |
| 303.15  | 1.287                                           | 1.234                                           | 1.113                                  | 1.099                                             | 1.077                                           | 1.032                                           |
| 308.15  | 1.284                                           | 1.231                                           | 1.110                                  | 1.096                                             | 1.074                                           | 1.029                                           |
| 313.15  | 1.281                                           | 1.227                                           | 1.107                                  | 1.093                                             | 1.070                                           | 1.025                                           |
| 318.15  | 1.278                                           | 1.224                                           | 1.104                                  | 1.090                                             | 1.067                                           | 1.021                                           |
| 323.15  | 1.274                                           | 1.221                                           | 1.101                                  | 1.086                                             | 1.064                                           | 1.017                                           |
| 328.15  | 1.271                                           | 1.218                                           | 1.098                                  | 1.083                                             | 1.060                                           | 1.013                                           |
| 333.15  | 1.268                                           | 1.214                                           | 1.095                                  | 1.080                                             | 1.057                                           | 1.010                                           |
| 338.15  | 1.265                                           | 1.211                                           | 1.092                                  | 1.077                                             | 1.054                                           | 1.006                                           |
| 343.15  | 1.261                                           | 1.208                                           | 1.089                                  | 1.074                                             | 1.050                                           | 1.002                                           |
| 348.15  | 1.258                                           | 1.205                                           | —                                      | —                                                 | 1.047                                           | 0.999                                           |
| 353.15  | 1.255                                           | 1.201                                           | —                                      | —                                                 | 1.043                                           | 0.995                                           |

\*Values taken from Tomé *et al.*<sup>1</sup>

**Table S2** Measured densities,  $\rho$  ( $\text{g}\cdot\text{cm}^{-3}$ ), of the ionic liquid mixtures studied in this work.

| <b><i>T</i> (K)</b> | [C <sub>2</sub> mim]                             | [C <sub>2</sub> mim]                             | [C <sub>2</sub> mim]                             | [C <sub>2</sub> mim]                             | [C <sub>2</sub> mim]                 | [C <sub>2</sub> mim]                 | [C <sub>2</sub> mim]                 |
|---------------------|--------------------------------------------------|--------------------------------------------------|--------------------------------------------------|--------------------------------------------------|--------------------------------------|--------------------------------------|--------------------------------------|
|                     | [C <sub>1</sub> SO <sub>4</sub> ] <sub>0.5</sub> | [SCN] <sub>0.5</sub>                 | [SCN] <sub>0.5</sub>                 | [SCN] <sub>0.5</sub>                 |
|                     | [SCN] <sub>0.5</sub>                             | [N(CN) <sub>2</sub> ] <sub>0.5</sub>             | [C(CN) <sub>3</sub> ] <sub>0.5</sub>             | [B(CN) <sub>4</sub> ] <sub>0.5</sub>             | [N(CN) <sub>2</sub> ] <sub>0.5</sub> | [C(CN) <sub>3</sub> ] <sub>0.5</sub> | [B(CN) <sub>4</sub> ] <sub>0.5</sub> |
| <b>293.15</b>       | 1.211                                            | 1.203                                            | 1.179                                            | 1.144                                            | 1.112                                | 1.099                                | 1.070                                |
| <b>298.15</b>       | 1.208                                            | 1.200                                            | 1.176                                            | 1.140                                            | 1.108                                | 1.096                                | 1.067                                |
| <b>303.15</b>       | 1.205                                            | 1.196                                            | 1.172                                            | 1.137                                            | 1.105                                | 1.092                                | 1.063                                |
| <b>308.15</b>       | 1.201                                            | 1.193                                            | 1.169                                            | 1.133                                            | 1.102                                | 1.089                                | 1.060                                |
| <b>313.15</b>       | 1.198                                            | 1.190                                            | 1.165                                            | 1.129                                            | 1.099                                | 1.086                                | 1.056                                |
| <b>318.15</b>       | 1.195                                            | 1.186                                            | 1.162                                            | 1.126                                            | 1.096                                | 1.083                                | 1.053                                |
| <b>323.15</b>       | 1.192                                            | 1.183                                            | 1.159                                            | 1.122                                            | 1.093                                | 1.080                                | 1.049                                |
| <b>328.15</b>       | 1.189                                            | 1.180                                            | 1.155                                            | 1.119                                            | 1.090                                | 1.076                                | 1.046                                |
| <b>333.15</b>       | 1.186                                            | 1.177                                            | 1.152                                            | 1.115                                            | 1.087                                | 1.073                                | 1.042                                |
| <b>338.15</b>       | 1.183                                            | 1.174                                            | 1.149                                            | 1.111                                            | 1.084                                | 1.070                                | 1.039                                |
| <b>343.15</b>       | 1.180                                            | 1.170                                            | 1.145                                            | 1.108                                            | 1.081                                | 1.067                                | 1.036                                |
| <b>348.15</b>       | 1.177                                            | 1.167                                            | 1.142                                            | 1.104                                            | 1.078                                | 1.064                                | 1.032                                |
| <b>353.15</b>       | 1.174                                            | 1.164                                            | 1.139                                            | 1.101                                            | 1.075                                | 1.060                                | 1.029                                |

**Table S3** Comparison of density ( $\rho$ ) and viscosity ( $\eta$ ) values of the pure ionic liquids measured in this work with those from literature at 298.15 K.

| <b>Ionic liquids</b>                                  | <b><math>\rho</math> (<math>\text{g}\cdot\text{cm}^{-3}</math>)</b> |                    | <b><math>\eta</math> (mPa.s)</b> |                     |
|-------------------------------------------------------|---------------------------------------------------------------------|--------------------|----------------------------------|---------------------|
|                                                       | This Work                                                           | Literature         | This Work                        | Literature          |
|                                                       | [C <sub>2</sub> mim][C <sub>1</sub> SO <sub>4</sub> ]               | 1.291              | 1.287 <sup>2</sup>               | 100.021             |
| [C <sub>2</sub> mim][C <sub>2</sub> SO <sub>4</sub> ] | 1.237                                                               | 1.237 <sup>3</sup> | 92.677                           | 95.90 <sup>3</sup>  |
| [C <sub>2</sub> mim][C(CN) <sub>3</sub> ]             | 1.081                                                               | 1.081 <sup>4</sup> | 14.187                           | 14.610 <sup>5</sup> |
| [C <sub>2</sub> mim][B(CN) <sub>4</sub> ]             | 1.036                                                               | 1.036 <sup>5</sup> | 17.793                           | 18.565 <sup>5</sup> |

**Table S4** Fitted parameters Equation (S1) for the studied ILs and their mixtures.

| Ionic Liquids                                                                                             | $b \times 10^{-4}$ | $a$   | $r^2$  |
|-----------------------------------------------------------------------------------------------------------|--------------------|-------|--------|
| [C <sub>2</sub> mim][C <sub>1</sub> SO <sub>4</sub> ]                                                     | -6.52              | 1.485 | 0.9995 |
| [C <sub>2</sub> mim][C <sub>2</sub> SO <sub>4</sub> ]                                                     | -6.55              | 1.433 | 0.9994 |
| [C <sub>2</sub> mim][SCN]                                                                                 | -6.00              | 1.295 | 1.0000 |
| [C <sub>2</sub> mim][N(CN) <sub>2</sub> ]                                                                 | -6.44              | 1.295 | 0.9992 |
| [C <sub>2</sub> mim][C(CN) <sub>3</sub> ]                                                                 | -6.85              | 1.485 | 0.9995 |
| [C <sub>2</sub> mim][B(CN) <sub>4</sub> ]                                                                 | -7.49              | 1.260 | 0.9996 |
| [C <sub>2</sub> mim][C <sub>1</sub> SO <sub>4</sub> ] <sub>0.5</sub> [SCN] <sub>0.5</sub>                 | -6.16              | 1.391 | 0.9994 |
| [C <sub>2</sub> mim][C <sub>1</sub> SO <sub>4</sub> ] <sub>0.5</sub> [N(CN) <sub>2</sub> ] <sub>0.5</sub> | -6.51              | 1.394 | 0.9994 |
| [C <sub>2</sub> mim][C <sub>1</sub> SO <sub>4</sub> ] <sub>0.5</sub> [C(CN) <sub>3</sub> ] <sub>0.5</sub> | -6.71              | 1.376 | 0.9995 |
| [C <sub>2</sub> mim][C <sub>1</sub> SO <sub>4</sub> ] <sub>0.5</sub> [B(CN) <sub>4</sub> ] <sub>0.5</sub> | -7.20              | 1.355 | 0.9996 |
| [C <sub>2</sub> mim][SCN] <sub>0.5</sub> [N(CN) <sub>2</sub> ] <sub>0.5</sub>                             | -6.07              | 1.289 | 0.9996 |
| [C <sub>2</sub> mim][SCN] <sub>0.5</sub> [C(CN) <sub>3</sub> ] <sub>0.5</sub>                             | -6.42              | 1.287 | 0.9994 |
| [C <sub>2</sub> mim][SCN] <sub>0.5</sub> [B(CN) <sub>4</sub> ] <sub>0.5</sub>                             | -6.89              | 1.272 | 0.9995 |

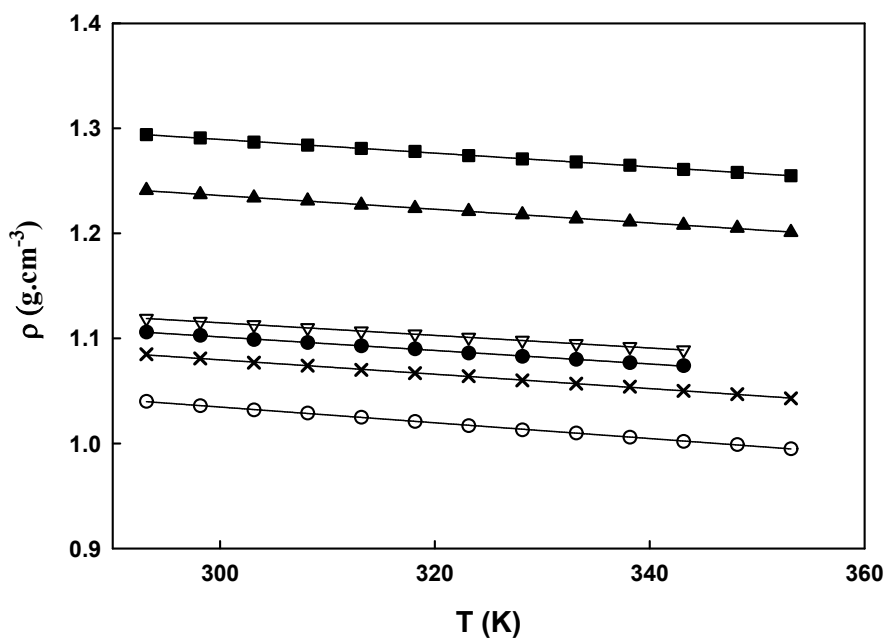**Figure S1** Densities ( $\rho$ ) of the pure ionic liquids measured in this work as a function of temperature (T): [C<sub>2</sub>mim][C<sub>1</sub>SO<sub>4</sub>] (■), [C<sub>2</sub>mim][C<sub>2</sub>SO<sub>4</sub>] (▲), [C<sub>2</sub>mim][SCN] (▽), [C<sub>2</sub>mim][N(CN)<sub>2</sub>] (●), [C<sub>2</sub>mim][C(CN)<sub>3</sub>] (◩), [C<sub>2</sub>mim][B(CN)<sub>4</sub>] (○).

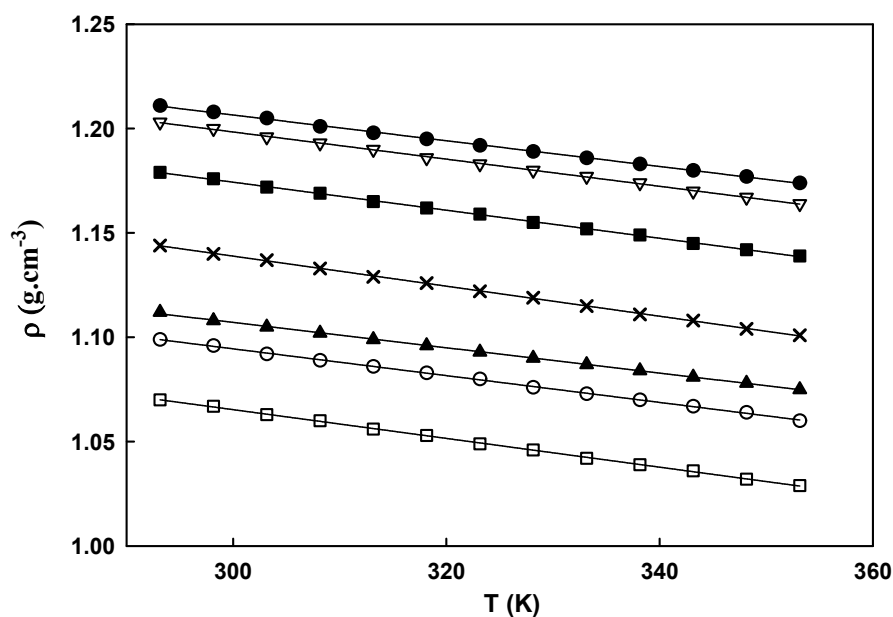

**Figure S2** Densities ( $\rho$ ) of the ionic liquid mixtures measured in this work as a function of temperature (T):  $[\text{C}_2\text{mim}][\text{C}_1\text{SO}_4]_{0.5}[\text{SCN}]_{0.5}$  (●),  $[\text{C}_2\text{mim}][\text{C}_1\text{SO}_4]_{0.5}[\text{N}(\text{CN})_2]_{0.5}$  (▽),  $[\text{C}_2\text{mim}][\text{C}_1\text{SO}_4]_{0.5}[\text{C}(\text{CN})_3]_{0.5}$  (■),  $[\text{C}_2\text{mim}][\text{C}_1\text{SO}_4]_{0.5}[\text{B}(\text{CN})_4]_{0.5}$  (×),  $[\text{C}_2\text{mim}][\text{SCN}]_{0.5}[\text{N}(\text{CN})_2]_{0.5}$  (▲),  $[\text{C}_2\text{mim}][\text{SCN}]_{0.5}[\text{C}(\text{CN})_3]_{0.5}$  (○),  $[\text{C}_2\text{mim}][\text{SCN}]_{0.5}[\text{B}(\text{CN})_4]_{0.5}$  (□).

**Table S5** Molar volumes,  $V_m$  ( $\text{cm}^3\cdot\text{mol}^{-1}$ ), of the pure ionic liquids studied in this work.

| $T$ (K) | $[\text{C}_2\text{mim}][\text{C}_1\text{SO}_4]$ | $[\text{C}_2\text{mim}][\text{C}_2\text{SO}_4]$ | $[\text{C}_2\text{mim}][\text{SCN}]^*$ | $[\text{C}_2\text{mim}][\text{N}(\text{CN})_2]^*$ | $[\text{C}_2\text{mim}][\text{C}(\text{CN})_3]$ | $[\text{C}_2\text{mim}][\text{B}(\text{CN})_4]$ |
|---------|-------------------------------------------------|-------------------------------------------------|----------------------------------------|---------------------------------------------------|-------------------------------------------------|-------------------------------------------------|
| 293.15  | 171.62                                          | 190.26                                          | 151.24                                 | 160.24                                            | 185.42                                          | 226.89                                          |
| 298.15  | 172.07                                          | 190.79                                          | 151.66                                 | 160.73                                            | 186.04                                          | 227.76                                          |
| 303.15  | 172.51                                          | 191.31                                          | 152.08                                 | 161.22                                            | 186.64                                          | 228.63                                          |
| 308.15  | 172.95                                          | 191.83                                          | 152.50                                 | 161.70                                            | 187.26                                          | 229.49                                          |
| 313.15  | 173.38                                          | 192.35                                          | 152.91                                 | 162.19                                            | 187.87                                          | 230.33                                          |
| 318.15  | 173.82                                          | 192.85                                          | 153.33                                 | 162.65                                            | 188.46                                          | 231.20                                          |
| 323.15  | 174.27                                          | 193.37                                          | 153.74                                 | 163.13                                            | 189.06                                          | 232.07                                          |
| 328.15  | 174.71                                          | 193.89                                          | 154.15                                 | 163.61                                            | 189.67                                          | 232.94                                          |
| 333.15  | 175.16                                          | 194.41                                          | 154.55                                 | 164.10                                            | 190.27                                          | 233.80                                          |
| 338.15  | 175.61                                          | 194.94                                          | 154.96                                 | 164.59                                            | 190.88                                          | 234.67                                          |
| 343.15  | 176.07                                          | 195.46                                          | 155.38                                 | 165.08                                            | 191.49                                          | 235.54                                          |
| 348.15  | 176.53                                          | 196.00                                          | —                                      | —                                                 | 192.11                                          | 236.35                                          |
| 353.15  | 177.00                                          | 196.55                                          | —                                      | —                                                 | 192.74                                          | 237.25                                          |

\*Values taken from Tomé *et al.*<sup>1</sup>

**Table S6** Molar volumes,  $V_m$  ( $\text{cm}^3\cdot\text{mol}^{-1}$ ), of the ionic liquid mixtures studied in this work.

| $T$ (K) | [C <sub>2</sub> mim]<br>[C <sub>1</sub> SO <sub>4</sub> ] <sub>0.5</sub><br>[SCN] <sub>0.5</sub> | [C <sub>2</sub> mim]<br>[C <sub>1</sub> SO <sub>4</sub> ] <sub>0.5</sub><br>[N(CN) <sub>2</sub> ] <sub>0.5</sub> | [C <sub>2</sub> mim]<br>[C <sub>1</sub> SO <sub>4</sub> ] <sub>0.5</sub><br>[C(CN) <sub>3</sub> ] <sub>0.5</sub> | [C <sub>2</sub> mim]<br>[C <sub>1</sub> SO <sub>4</sub> ] <sub>0.5</sub><br>[B(CN) <sub>4</sub> ] <sub>0.5</sub> | [C <sub>2</sub> mim]<br>[SCN] <sub>0.5</sub><br>[N(CN) <sub>2</sub> ] <sub>0.5</sub> | [C <sub>2</sub> mim]<br>[SCN] <sub>0.5</sub><br>[C(CN) <sub>3</sub> ] <sub>0.5</sub> | [C <sub>2</sub> mim]<br>[SCN] <sub>0.5</sub><br>[B(CN) <sub>4</sub> ] <sub>0.5</sub> |
|---------|--------------------------------------------------------------------------------------------------|------------------------------------------------------------------------------------------------------------------|------------------------------------------------------------------------------------------------------------------|------------------------------------------------------------------------------------------------------------------|--------------------------------------------------------------------------------------|--------------------------------------------------------------------------------------|--------------------------------------------------------------------------------------|
| 293.15  | 161.55                                                                                           | 165.94                                                                                                           | 179.41                                                                                                           | 200.24                                                                                                           | 155.85                                                                               | 168.48                                                                               | 189.34                                                                               |
| 298.15  | 161.99                                                                                           | 166.41                                                                                                           | 179.95                                                                                                           | 200.89                                                                                                           | 156.31                                                                               | 169.01                                                                               | 189.99                                                                               |
| 303.15  | 162.42                                                                                           | 166.88                                                                                                           | 180.49                                                                                                           | 201.55                                                                                                           | 156.76                                                                               | 169.52                                                                               | 190.62                                                                               |
| 308.15  | 162.85                                                                                           | 167.34                                                                                                           | 181.02                                                                                                           | 202.21                                                                                                           | 157.21                                                                               | 170.03                                                                               | 191.26                                                                               |
| 313.15  | 163.26                                                                                           | 167.81                                                                                                           | 181.56                                                                                                           | 202.85                                                                                                           | 157.66                                                                               | 170.54                                                                               | 191.89                                                                               |
| 318.15  | 163.69                                                                                           | 168.27                                                                                                           | 182.10                                                                                                           | 203.48                                                                                                           | 158.10                                                                               | 171.04                                                                               | 192.51                                                                               |
| 323.15  | 164.12                                                                                           | 168.74                                                                                                           | 182.63                                                                                                           | 204.14                                                                                                           | 158.54                                                                               | 171.54                                                                               | 193.15                                                                               |
| 328.15  | 164.55                                                                                           | 169.18                                                                                                           | 183.14                                                                                                           | 204.79                                                                                                           | 158.98                                                                               | 172.04                                                                               | 193.78                                                                               |
| 333.15  | 164.98                                                                                           | 169.64                                                                                                           | 183.67                                                                                                           | 205.45                                                                                                           | 159.42                                                                               | 172.54                                                                               | 194.43                                                                               |
| 338.15  | 165.41                                                                                           | 170.10                                                                                                           | 184.21                                                                                                           | 206.10                                                                                                           | 159.86                                                                               | 173.06                                                                               | 195.06                                                                               |
| 343.15  | 165.83                                                                                           | 170.56                                                                                                           | 184.74                                                                                                           | 206.76                                                                                                           | 160.30                                                                               | 173.58                                                                               | 195.70                                                                               |
| 348.15  | 166.26                                                                                           | 171.04                                                                                                           | 185.28                                                                                                           | 207.42                                                                                                           | 160.75                                                                               | 174.10                                                                               | 196.35                                                                               |
| 353.15  | 166.71                                                                                           | 171.50                                                                                                           | 185.82                                                                                                           | 208.08                                                                                                           | 161.21                                                                               | 174.62                                                                               | 196.99                                                                               |

**Table S7** Excess molar volumes,  $V^E$  ( $\text{cm}^3\cdot\text{mol}^{-1}$ ), of the ionic liquid mixtures studied in this work.

| $T$ (K) | [C <sub>2</sub> mim]<br>[C <sub>1</sub> SO <sub>4</sub> ] <sub>0.5</sub><br>[SCN] <sub>0.5</sub> | [C <sub>2</sub> mim]<br>[C <sub>1</sub> SO <sub>4</sub> ] <sub>0.5</sub><br>[N(CN) <sub>2</sub> ] <sub>0.5</sub> | [C <sub>2</sub> mim]<br>[C <sub>1</sub> SO <sub>4</sub> ] <sub>0.5</sub><br>[C(CN) <sub>3</sub> ] <sub>0.5</sub> | [C <sub>2</sub> mim]<br>[C <sub>1</sub> SO <sub>4</sub> ] <sub>0.5</sub><br>[B(CN) <sub>4</sub> ] <sub>0.5</sub> | [C <sub>2</sub> mim]<br>[SCN] <sub>0.5</sub><br>[N(CN) <sub>2</sub> ] <sub>0.5</sub> | [C <sub>2</sub> mim]<br>[SCN] <sub>0.5</sub><br>[C(CN) <sub>3</sub> ] <sub>0.5</sub> | [C <sub>2</sub> mim]<br>[SCN] <sub>0.5</sub><br>[B(CN) <sub>4</sub> ] <sub>0.5</sub> |
|---------|--------------------------------------------------------------------------------------------------|------------------------------------------------------------------------------------------------------------------|------------------------------------------------------------------------------------------------------------------|------------------------------------------------------------------------------------------------------------------|--------------------------------------------------------------------------------------|--------------------------------------------------------------------------------------|--------------------------------------------------------------------------------------|
| 293.15  | 0.1451                                                                                           | -0.0791                                                                                                          | 0.8889                                                                                                           | 0.9872                                                                                                           | 0.0487                                                                               | 0.1800                                                                               | 0.2998                                                                               |
| 298.15  | 0.1483                                                                                           | -0.0779                                                                                                          | 0.8954                                                                                                           | 0.9790                                                                                                           | 0.0530                                                                               | 0.1842                                                                               | 0.3036                                                                               |
| 303.15  | 0.1560                                                                                           | -0.0697                                                                                                          | 0.9121                                                                                                           | 0.9771                                                                                                           | 0.0548                                                                               | 0.1883                                                                               | 0.2963                                                                               |
| 308.15  | 0.1707                                                                                           | -0.0705                                                                                                          | 0.9187                                                                                                           | 0.9877                                                                                                           | 0.0683                                                                               | 0.1935                                                                               | 0.3127                                                                               |
| 313.15  | 0.1627                                                                                           | -0.0552                                                                                                          | 0.9373                                                                                                           | 0.9969                                                                                                           | 0.0705                                                                               | 0.1925                                                                               | 0.3184                                                                               |
| 318.15  | 0.1569                                                                                           | -0.0560                                                                                                          | 0.9558                                                                                                           | 0.9697                                                                                                           | 0.0678                                                                               | 0.1926                                                                               | 0.2945                                                                               |
| 323.15  | 0.1625                                                                                           | -0.0543                                                                                                          | 0.9662                                                                                                           | 0.9740                                                                                                           | 0.0603                                                                               | 0.1815                                                                               | 0.2893                                                                               |
| 328.15  | 0.1636                                                                                           | -0.0717                                                                                                          | 0.9525                                                                                                           | 0.9682                                                                                                           | 0.0478                                                                               | 0.1779                                                                               | 0.2863                                                                               |
| 333.15  | 0.1624                                                                                           | -0.0848                                                                                                          | 0.9553                                                                                                           | 0.9675                                                                                                           | 0.0373                                                                               | 0.1719                                                                               | 0.2908                                                                               |
| 338.15  | 0.1565                                                                                           | -0.0980                                                                                                          | 0.9634                                                                                                           | 0.9590                                                                                                           | 0.0220                                                                               | 0.1773                                                                               | 0.2797                                                                               |
| 343.15  | 0.1412                                                                                           | -0.1240                                                                                                          | 0.9584                                                                                                           | 0.9596                                                                                                           | -0.0064                                                                              | 0.1796                                                                               | 0.2761                                                                               |
| 348.15  | 0.1208                                                                                           | -0.1454                                                                                                          | 0.9557                                                                                                           | 0.9791                                                                                                           | -0.0446                                                                              | 0.1639                                                                               | 0.2944                                                                               |
| 353.15  | 0.1002                                                                                           | -0.1661                                                                                                          | 0.9483                                                                                                           | 0.9504                                                                                                           | -0.0625                                                                              | 0.1486                                                                               | 0.2548                                                                               |

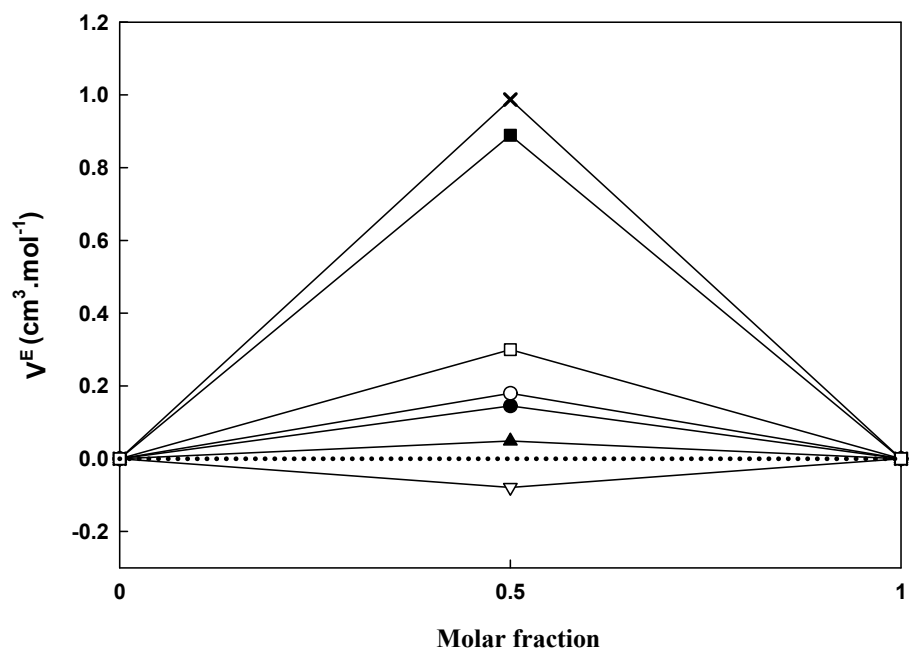

**Figure S3** Excess molar volumes of the studied ionic liquid mixtures at 293.15 K: [C<sub>2</sub>mim][C<sub>1</sub>SO<sub>4</sub>]<sub>0.5</sub>[SCN]<sub>0.5</sub> (●), [C<sub>2</sub>mim][C<sub>1</sub>SO<sub>4</sub>]<sub>0.5</sub>[N(CN)<sub>2</sub>]<sub>0.5</sub> (▽), [C<sub>2</sub>mim][C<sub>1</sub>SO<sub>4</sub>]<sub>0.5</sub>[C(CN)<sub>3</sub>]<sub>0.5</sub> (■), [C<sub>2</sub>mim][C<sub>1</sub>SO<sub>4</sub>]<sub>0.5</sub>[B(CN)<sub>4</sub>]<sub>0.5</sub> (⊗), [C<sub>2</sub>mim][SCN]<sub>0.5</sub>[N(CN)<sub>2</sub>]<sub>0.5</sub> (▲), [C<sub>2</sub>mim][SCN]<sub>0.5</sub>[C(CN)<sub>3</sub>]<sub>0.5</sub> (○), [C<sub>2</sub>mim][SCN]<sub>0.5</sub>[B(CN)<sub>4</sub>]<sub>0.5</sub> (□).



## Viscosity measurements

Viscosity values for the pure ILs and their mixtures, in a range temperature from 293.15 K to 353.15 K, are listed in Table S8 and Table S9 and depicted in Figure S4 and Figure S5, respectively. The viscosity deviations ( $\Delta\eta$ ) for the IL mixtures were calculated using equation (S3).

$$\Delta\ln(\eta) = \ln(\eta_M) - [x_1\ln(\eta_1) + (1-x_1)\ln(\eta_2)] \quad (\text{S3})$$

where  $\eta$  corresponds to viscosity (mPa·s) and  $x$  is the molar fraction. The subscript  $1$  and  $2$  correspond to the two pure ILs and the subscript  $M$  denotes the IL mixture. The calculated viscosity deviations values are presented in Table S10. The viscosity deviations for the studied mixtures are represented in Figure S6, at 293.15K.

For all pure ILs and also their mixtures, the viscosity decreases with temperature. This behaviour with temperature was correlated using a logarithmic equation based on Arrhenius model, described by the expression (S4):

$$\ln(\eta) = \ln(\eta_\infty) - \frac{E_a}{RT} \quad (\text{S4})$$

where  $\eta$  is the viscosity (mPa·s),  $\eta_\infty$  is a pre-exponential constant (mPa·s),  $E_a$  is the activation energy ( $\text{kJ}\cdot\text{mol}^{-1}$ ),  $R$  is the ideal gas constant and  $T$  is the temperature (K). The values corresponding to  $\eta_\infty$ ,  $E_a$  and the correlation coefficient ( $r^2$ ) for each ILs are given in Table S11.

As observed for density, the viscosity of the IL mixtures display intermediate values between those of the pure ILs. Accordingly, at a fixed temperature, the viscosity of pure ILs can be ordered by the following order of the anions:  $[\text{C}_1\text{SO}_4]^- > [\text{C}_2\text{SO}_4]^- > [\text{SCN}]^- > [\text{B}(\text{CN})_4]^- > [\text{N}(\text{CN})_2]^- > [\text{C}(\text{CN})_3]^-$ . Furthermore, the viscosities of the sulfate-based ILs and the cyano-based ILs are very different from each other, meaning that, as density, this property is directly related to the chemical structure of the anion.

Both negative and positive viscosity deviations were found for the IL mixtures studied in this work. As it can be seen from Table S10, all the mixtures studied show negative values for all the IL mixtures prepared, in the entire range of temperatures, with the exception of the following mixtures:  $[\text{C}_2\text{mim}][\text{C}_1\text{SO}_4]_{0.5}[\text{SCN}]_{0.5}$ ,  $[\text{C}_2\text{mim}][\text{C}_1\text{SO}_4]_{0.5}[\text{N}(\text{CN})_2]_{0.5}$  and  $[\text{C}_2\text{MIM}][\text{C}_1\text{SO}_4]_{0.5}[\text{B}(\text{CN})_4]_{0.5}$ , which presented positive viscosity deviations values at some temperatures. Nevertheless, the deviations from ideality are very small. In terms of activation energies, it is interesting to observe that the pure ILs containing sulfate anions, namely  $[\text{C}_2\text{mim}][\text{C}_1\text{SO}_4]$  and  $[\text{C}_2\text{mim}][\text{C}_2\text{SO}_4]$ , show a more pronounced temperature dependence of viscosity compared to the cyano-based ILs, which is illustrated by their larger  $E_a$  value.

The use of equation (S4) to describe the temperature behaviour of viscosity allows the discussion of the energy barrier of a fluid to shear stress,  $E_a$  values. The higher the  $E_a$ , the more difficult is the ions to move past each other. This can be a direct consequence of the size or entanglement of the ions and/or the presence of stronger interactions within the fluid. The activation energies ( $E_a$ ) of pure ILs can be interpreted as follows: the pure ILs composed by anions having the sulfate groups exhibited the highest  $E_a$ , approximately 30 kJ·mol<sup>-1</sup>; and the pure ILs combining cyano groups in their anion structure present  $E_a$  values of about 20 kJ·mol<sup>-1</sup>.

**Table S8** Measured viscosities,  $\eta$  (mPa·s), of the pure ionic liquids studied in this work.

| $T$ (K)       | [C <sub>2</sub> mim][C <sub>1</sub> SO <sub>4</sub> ] | [C <sub>2</sub> mim][C <sub>2</sub> SO <sub>4</sub> ] | [C <sub>2</sub> mim][SCN]* | [C <sub>2</sub> mim][N(CN) <sub>2</sub> ]* | [C <sub>2</sub> mim][C(CN) <sub>3</sub> ] | [C <sub>2</sub> mim][B(CN) <sub>4</sub> ] |
|---------------|-------------------------------------------------------|-------------------------------------------------------|----------------------------|--------------------------------------------|-------------------------------------------|-------------------------------------------|
| <b>293.15</b> | 127.523                                               | 119.987                                               | 27.846                     | 17.947                                     | 16.624                                    | 21.434                                    |
| <b>298.15</b> | 100.021                                               | 92.677                                                | 23.431                     | 15.426                                     | 14.187                                    | 17.793                                    |
| <b>303.15</b> | 79.863                                                | 73.015                                                | 19.937                     | 13.366                                     | 12.177                                    | 14.933                                    |
| <b>308.15</b> | 64.789                                                | 58.563                                                | 17.146                     | 11.696                                     | 10.578                                    | 12.696                                    |
| <b>313.15</b> | 53.474                                                | 47.866                                                | 14.900                     | 10.323                                     | 9.024                                     | 10.668                                    |
| <b>318.15</b> | 44.430                                                | 39.451                                                | 13.058                     | 9.177                                      | 8.202                                     | 9.490                                     |
| <b>323.15</b> | 37.443                                                | 33.041                                                | 11.538                     | 8.222                                      | 7.314                                     | 8.324                                     |
| <b>328.15</b> | 31.902                                                | 27.975                                                | 10.269                     | 7.410                                      | 6.563                                     | 7.359                                     |
| <b>333.15</b> | 27.520                                                | 23.993                                                | 9.200                      | 6.712                                      | 5.719                                     | 6.354                                     |
| <b>338.15</b> | 23.805                                                | 20.676                                                | 8.289                      | 6.115                                      | 5.379                                     | 5.883                                     |
| <b>343.15</b> | 20.794                                                | 18.005                                                | 7.511                      | 5.597                                      | 4.910                                     | 5.305                                     |
| <b>348.15</b> | 18.305                                                | 15.797                                                | —                          | —                                          | 4.501                                     | 4.814                                     |
| <b>353.15</b> | 16.146                                                | 13.996                                                | —                          | —                                          | 3.980                                     | 4.230                                     |

\*Values taken from Tomé *et al.*<sup>1</sup>

**Table S9** Measured viscosities,  $\eta$  (mPa·s), of the ionic liquid mixtures studied in this work.

| <b><i>T</i> (K)</b> | [C <sub>2</sub> mim]                             | [C <sub>2</sub> mim]                             | [C <sub>2</sub> mim]                             | [C <sub>2</sub> mim]                             | [C <sub>2</sub> mim]                 | [C <sub>2</sub> mim]                 | [C <sub>2</sub> mim]                 |
|---------------------|--------------------------------------------------|--------------------------------------------------|--------------------------------------------------|--------------------------------------------------|--------------------------------------|--------------------------------------|--------------------------------------|
|                     | [C <sub>1</sub> SO <sub>4</sub> ] <sub>0.5</sub> | [SCN] <sub>0.5</sub>                 | [SCN] <sub>0.5</sub>                 | [SCN] <sub>0.5</sub>                 |
|                     | [SCN] <sub>0.5</sub>                             | [N(CN) <sub>2</sub> ] <sub>0.5</sub>             | [C(CN) <sub>3</sub> ] <sub>0.5</sub>             | [B(CN) <sub>4</sub> ] <sub>0.5</sub>             | [N(CN) <sub>2</sub> ] <sub>0.5</sub> | [C(CN) <sub>3</sub> ] <sub>0.5</sub> | [B(CN) <sub>4</sub> ] <sub>0.5</sub> |
| <b>293.15</b>       | 60.380                                           | 49.200                                           | 41.022                                           | 53.726                                           | 21.287                               | 20.711                               | 23.233                               |
| <b>298.15</b>       | 48.805                                           | 40.105                                           | 33.341                                           | 42.771                                           | 18.233                               | 17.560                               | 19.442                               |
| <b>303.15</b>       | 40.075                                           | 33.151                                           | 27.508                                           | 34.690                                           | 15.714                               | 15.007                               | 16.435                               |
| <b>308.15</b>       | 33.365                                           | 27.778                                           | 23.034                                           | 28.596                                           | 13.678                               | 12.970                               | 14.068                               |
| <b>313.15</b>       | 28.097                                           | 23.429                                           | 19.346                                           | 23.801                                           | 11.764                               | 11.070                               | 11.913                               |
| <b>318.15</b>       | 23.981                                           | 20.187                                           | 16.747                                           | 20.377                                           | 10.644                               | 9.977                                | 10.607                               |
| <b>323.15</b>       | 20.651                                           | 17.491                                           | 14.513                                           | 17.326                                           | 9.494                                | 8.858                                | 9.331                                |
| <b>328.15</b>       | 17.939                                           | 15.283                                           | 12.688                                           | 14.994                                           | 8.528                                | 7.925                                | 8.251                                |
| <b>333.15</b>       | 15.697                                           | 13.402                                           | 11.063                                           | 13.026                                           | 7.507                                | 6.933                                | 7.158                                |
| <b>338.15</b>       | 13.886                                           | 11.943                                           | 9.937                                            | 11.525                                           | 6.999                                | 6.460                                | 6.602                                |
| <b>343.15</b>       | 12.347                                           | 10.669                                           | 8.885                                            | 10.226                                           | 6.391                                | 5.880                                | 5.953                                |
| <b>348.15</b>       | 11.045                                           | 9.588                                            | 7.996                                            | 9.135                                            | 5.863                                | 5.378                                | 5.404                                |
| <b>353.15</b>       | 9.909                                            | 8.614                                            | 7.150                                            | 8.144                                            | 5.252                                | 4.784                                | 4.765                                |

**Table S10** Viscosity deviations,  $\Delta\eta$  (mPa·s), of the ionic liquid mixtures studied in this work.

| <b><i>T</i> (K)</b> | [C <sub>2</sub> mim]                             | [C <sub>2</sub> mim]                             | [C <sub>2</sub> mim]                             | [C <sub>2</sub> mim]                             | [C <sub>2</sub> mim]                 | [C <sub>2</sub> mim]                 | [C <sub>2</sub> mim]                 |
|---------------------|--------------------------------------------------|--------------------------------------------------|--------------------------------------------------|--------------------------------------------------|--------------------------------------|--------------------------------------|--------------------------------------|
|                     | [C <sub>1</sub> SO <sub>4</sub> ] <sub>0.5</sub> | [SCN] <sub>0.5</sub>                 | [SCN] <sub>0.5</sub>                 | [SCN] <sub>0.5</sub>                 |
|                     | [SCN] <sub>0.5</sub>                             | [N(CN) <sub>2</sub> ] <sub>0.5</sub>             | [C(CN) <sub>3</sub> ] <sub>0.5</sub>             | [B(CN) <sub>4</sub> ] <sub>0.5</sub>             | [N(CN) <sub>2</sub> ] <sub>0.5</sub> | [C(CN) <sub>3</sub> ] <sub>0.5</sub> | [B(CN) <sub>4</sub> ] <sub>0.5</sub> |
| <b>293.15</b>       | 0.0102                                           | 0.0557                                           | -0.1155                                          | 0.0273                                           | -0.0242                              | -0.0411                              | -0.0532                              |
| <b>298.15</b>       | 0.0037                                           | 0.0439                                           | -0.1220                                          | 0.0138                                           | -0.0232                              | -0.0420                              | -0.0534                              |
| <b>303.15</b>       | -0.0008                                          | 0.0356                                           | -0.1255                                          | 0.0045                                           | -0.0221                              | -0.0426                              | -0.0538                              |
| <b>308.15</b>       | -0.0044                                          | 0.0282                                           | -0.1280                                          | -0.0030                                          | -0.0210                              | -0.0431                              | -0.0531                              |
| <b>313.15</b>       | -0.0027                                          | 0.0270                                           | -0.1270                                          | -0.0035                                          | -0.0211                              | -0.0445                              | -0.0548                              |
| <b>318.15</b>       | -0.0110                                          | 0.0150                                           | -0.1309                                          | -0.0077                                          | -0.0194                              | -0.0432                              | -0.0549                              |
| <b>323.15</b>       | -0.0136                                          | 0.0104                                           | -0.1313                                          | -0.0188                                          | -0.0192                              | -0.0436                              | -0.0562                              |
| <b>328.15</b>       | -0.0164                                          | 0.0059                                           | -0.1314                                          | -0.0216                                          | -0.0182                              | -0.0427                              | -0.0597                              |
| <b>333.15</b>       | -0.0125                                          | 0.0117                                           | -0.1257                                          | -0.0150                                          | -0.0189                              | -0.0441                              | -0.0647                              |
| <b>338.15</b>       | -0.0203                                          | -0.0017                                          | -0.1299                                          | -0.0265                                          | -0.0172                              | -0.0417                              | -0.0649                              |
| <b>343.15</b>       | -0.0212                                          | -0.0039                                          | -0.1286                                          | -0.0267                                          | -0.0163                              | -0.0414                              | -0.0677                              |
| <b>348.15</b>       | -0.0228                                          | -0.0066                                          | -0.1268                                          | -0.0273                                          | -0.0161                              | -0.0410                              | -0.0699                              |
| <b>353.15</b>       | -0.0152                                          | 0.0065                                           | -0.1144                                          | -0.0146                                          | -0.0152                              | -0.0433                              | -0.0776                              |

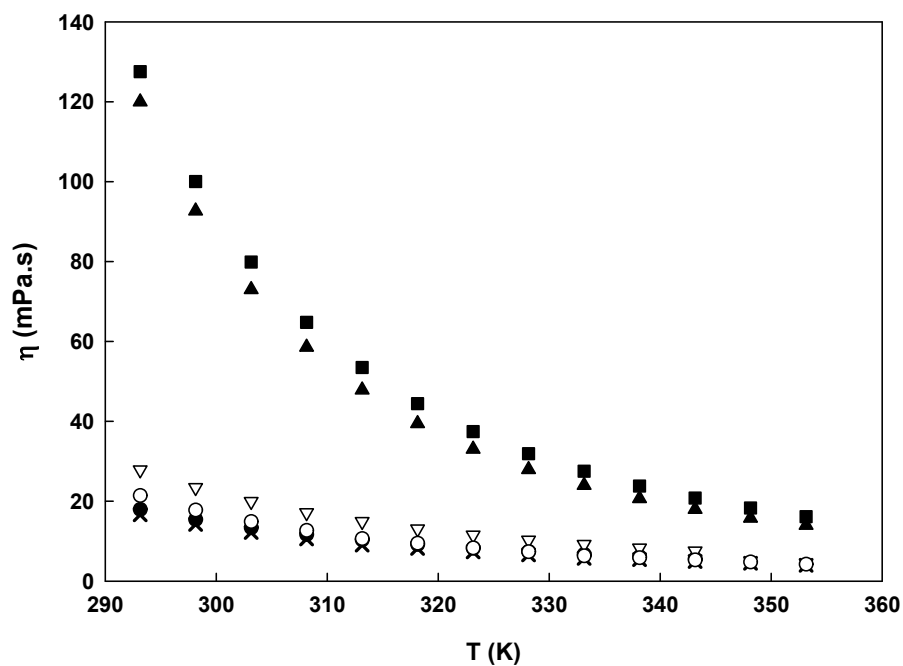

**Figure S4** Measured viscosities of the pure ionic liquids studied in this work as a function of temperature (T):  $[\text{C}_2\text{mim}][\text{C}_1\text{SO}_4]$  (■),  $[\text{C}_2\text{mim}][\text{C}_2\text{SO}_4]$  (▲),  $[\text{C}_2\text{mim}][\text{SCN}]$  (▽),  $[\text{C}_2\text{mim}][\text{N}(\text{CN})_2]$  (●),  $[\text{C}_2\text{mim}][\text{C}(\text{CN})_3]$  (⊠) and  $[\text{C}_2\text{mim}][\text{B}(\text{CN})_4]$  (○).

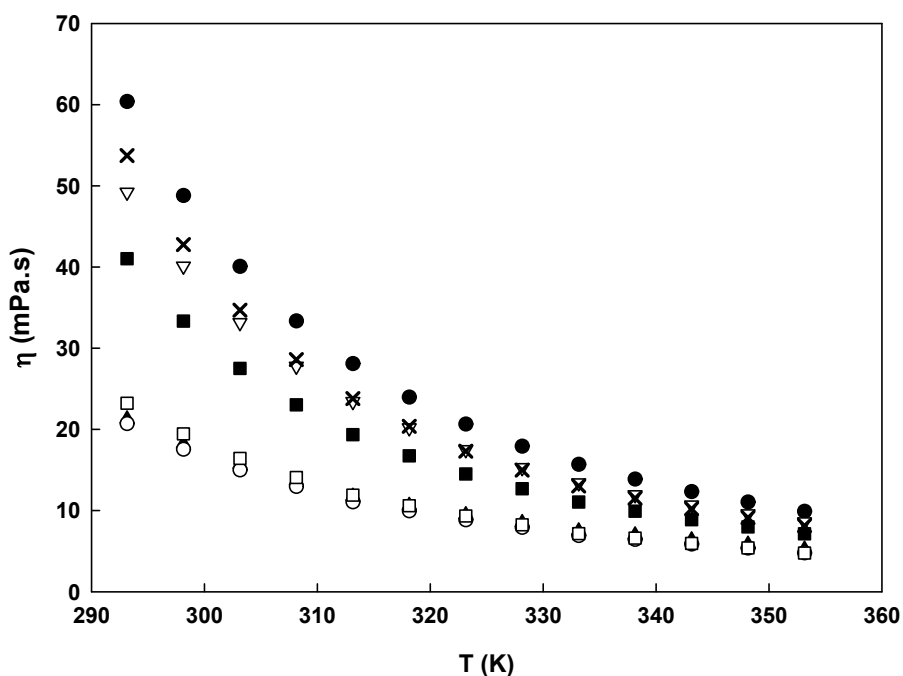

**Figure S5** Measured viscosities of the ionic liquid mixtures studied in this work:  $[\text{C}_2\text{mim}][\text{C}_1\text{SO}_4]_{0.5}[\text{SCN}]_{0.5}$  (●),  $[\text{C}_2\text{mim}][\text{C}_1\text{SO}_4]_{0.5}[\text{N}(\text{CN})_2]_{0.5}$  (▽),  $[\text{C}_2\text{mim}][\text{C}_1\text{SO}_4]_{0.5}[\text{C}(\text{CN})_3]_{0.5}$  (■),  $[\text{C}_2\text{mim}][\text{C}_1\text{SO}_4]_{0.5}[\text{B}(\text{CN})_4]_{0.5}$  (⊠),  $[\text{C}_2\text{mim}][\text{SCN}]_{0.5}[\text{N}(\text{CN})_2]_{0.5}$  (▲),  $[\text{C}_2\text{mim}][\text{SCN}]_{0.5}[\text{C}(\text{CN})_3]_{0.5}$  (○),  $[\text{C}_2\text{mim}][\text{SCN}]_{0.5}[\text{B}(\text{CN})_4]_{0.5}$  (□).

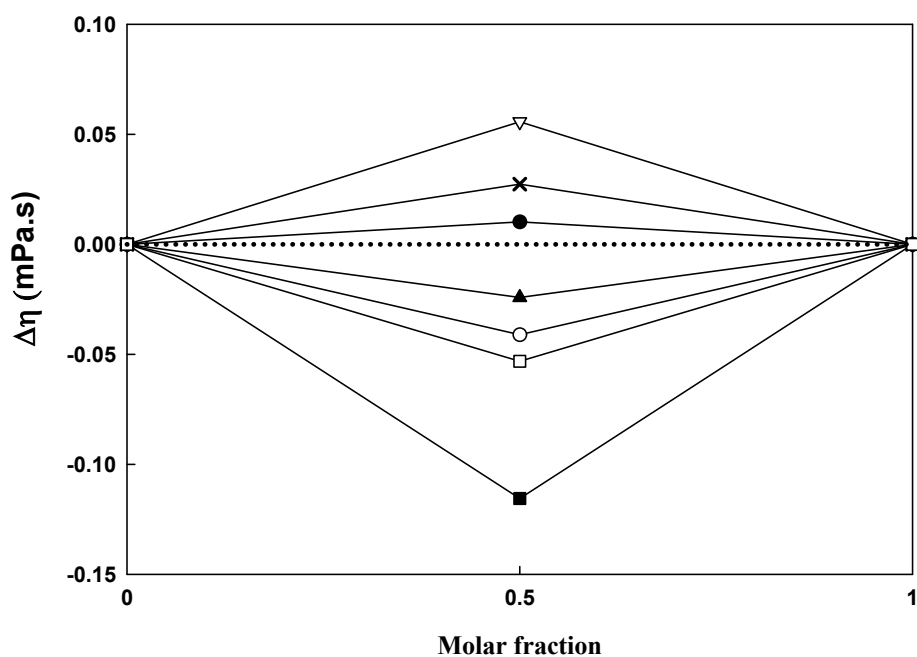

**Figure S6** Viscosity deviations of the ionic liquid mixtures studied in this work at 293.15 K: [C<sub>2</sub>mim][C<sub>1</sub>SO<sub>4</sub>]<sub>0.5</sub>[SCN]<sub>0.5</sub> (●), [C<sub>2</sub>mim][C<sub>1</sub>SO<sub>4</sub>]<sub>0.5</sub>[N(CN)<sub>2</sub>]<sub>0.5</sub> (∇), [C<sub>2</sub>mim][C<sub>1</sub>SO<sub>4</sub>]<sub>0.5</sub>[C(CN)<sub>3</sub>]<sub>0.5</sub> (■), [C<sub>2</sub>mim][C<sub>1</sub>SO<sub>4</sub>]<sub>0.5</sub>[B(CN)<sub>4</sub>]<sub>0.5</sub> (⊗), [C<sub>2</sub>mim][SCN]<sub>0.5</sub>[N(CN)<sub>2</sub>]<sub>0.5</sub> (▲), [C<sub>2</sub>mim][SCN]<sub>0.5</sub>[C(CN)<sub>3</sub>]<sub>0.5</sub> (○), [C<sub>2</sub>mim][SCN]<sub>0.5</sub>[B(CN)<sub>4</sub>]<sub>0.5</sub> (□).

**Table S11** Correlation parameters of Equation (S4).

| Ionic Liquids                                                                                             | $\eta_{\infty} \times 10^{-3}$ | $-Ea$<br>(KJ.mol <sup>-1</sup> ) | $r^2$  |
|-----------------------------------------------------------------------------------------------------------|--------------------------------|----------------------------------|--------|
| [C <sub>2</sub> mim][C <sub>1</sub> SO <sub>4</sub> ]                                                     | 0.683                          | 29.42                            | 0.9972 |
| [C <sub>2</sub> mim][C <sub>2</sub> SO <sub>4</sub> ]                                                     | 0.388                          | 30.62                            | 0.9963 |
| [C <sub>2</sub> mim][SCN]                                                                                 | 3.46                           | 21.84                            | 0.9981 |
| [C <sub>2</sub> mim][N(CN) <sub>2</sub> ]                                                                 | 6.02                           | 19.43                            | 0.9983 |
| [C <sub>2</sub> mim][C(CN) <sub>3</sub> ]                                                                 | 4.23                           | 20.07                            | 0.9967 |
| [C <sub>2</sub> mim][B(CN) <sub>4</sub> ]                                                                 | 1.74                           | 22.83                            | 0.9965 |
| [C <sub>2</sub> mim][C <sub>1</sub> SO <sub>4</sub> ] <sub>0.5</sub> [SCN] <sub>0.5</sub>                 | 1.47                           | 25.74                            | 0.9970 |
| [C <sub>2</sub> mim][C <sub>1</sub> SO <sub>4</sub> ] <sub>0.5</sub> [N(CN) <sub>2</sub> ] <sub>0.5</sub> | 1.77                           | 24.80                            | 0.9969 |
| [C <sub>2</sub> mim][C <sub>1</sub> SO <sub>4</sub> ] <sub>0.5</sub> [C(CN) <sub>3</sub> ] <sub>0.5</sub> | 1.48                           | 24.79                            | 0.9964 |
| [C <sub>2</sub> mim][C <sub>1</sub> SO <sub>4</sub> ] <sub>0.5</sub> [B(CN) <sub>4</sub> ] <sub>0.5</sub> | 0.841                          | 26.79                            | 0.9962 |
| [C <sub>2</sub> mim][SCN] <sub>0.5</sub> [N(CN) <sub>2</sub> ] <sub>0.5</sub>                             | 6.15                           | 19.77                            | 0.9973 |
| [C <sub>2</sub> mim][SCN] <sub>0.5</sub> [C(CN) <sub>3</sub> ] <sub>0.5</sub>                             | 4.16                           | 20.64                            | 0.9969 |
| [C <sub>2</sub> mim][SCN] <sub>0.5</sub> [B(CN) <sub>4</sub> ] <sub>0.5</sub>                             | 2.32                           | 22.34                            | 0.9975 |

## References:

1. Tomé, L. C.; Patinha, D. J. S.; Freire, C. S. R.; Rebelo, L. P. N.; Marrucho, I. M., CO<sub>2</sub> separation applying ionic liquid mixtures: the effect of mixing different anions on gas permeation through supported ionic liquid membranes. *RSC Adv.* **2013**, *3* (30), 12220-12229.
2. Bhattacharjee, A.; Varanda, C.; Freire, M. G.; Matted, S.; Santos, L. M. N. B. F.; Marrucho, I. M.; Coutinho, J. A. P., Density and Viscosity Data for Binary Mixtures of 1-Alkyl-3-methylimidazolium Alkylsulfates + Water. *J. Chem. Eng. Data* **2012**, *57* (12), 3473-3482.
3. Pereiro, A. B.; Araujo, J. M. M.; Oliveira, F. S.; Bernardes, C. E. S.; Esperanca, J. M. S. S.; Canongia Lopes, J. N.; Marrucho, I. M.; Rebelo, L. P. N., Inorganic salts in purely ionic liquid media: the development of high ionicity ionic liquids (HIILs). *Chem. Commun.* **2012**, *48* (30), 3656-3658.
4. Fröba, A. P.; Rausch, M. H.; Krzeminski, K.; Assenbaum, D.; Wasserscheid, P.; Leipertz, A., Thermal Conductivity of Ionic Liquids: Measurement and Prediction. *Int. J. Thermophys.* **2010**, *31* (11-12), 2059-2077.
5. Neves, C. M. S. S.; Kurnia, K. A.; Coutinho, J. A. P.; Marrucho, I. M.; Lopes, J. N. C.; Freire, M. G.; Rebelo, L. P. N., Systematic Study of the Thermophysical Properties of Imidazolium-Based Ionic Liquids with Cyano-Functionalized Anions. *J. Phys. Chem. B* **2013**, *117* (35), 10271-10283.
6. Vural, U.S.; Muradoglu, V. and Vural, S., Excess molar volumes, and refractive index of binary mixtures of glycerol + methanol and glycerol + water at 298.15 K and 303.15 K. *B. Chem. Soc. Ethiopia*, **2011**, *25*, 111-118.
